# Supplementary material for: Characterization of oligomers from methylglyoxal under dark conditions: a pathway to produce secondary organic aerosol through cloud processing during nighttime
Source: Copernicus journal article supplement (doi:10.5194/acp-10-3803-2010), 2010-04-23
Supplement: Supplementary file 1 [file acp-10-3803-2010-supplement.pdf]

## Supplement for:

### Characterization of oligomers from methylglyoxal under dark conditions: A pathway to produce secondary organic aerosol through cloud processing during nighttime

F. Yasmeeen<sup>1,2</sup>, N. Sauret<sup>1\*</sup>, J.-F. Gal<sup>1</sup>, P.-C. Maria<sup>1</sup>, L. Massi<sup>3</sup>, W. Maenhaut<sup>4</sup>, and M. Claeys<sup>2\*</sup>

<sup>1</sup>Laboratoire de Radiochimie Sciences Analytique et Environnement, Institut de Chimie de Nice (CNRS, FR 3037), University of Nice Sophia-Antipolis, Faculty des Sciences, Parc Valrose, 06108 Nice Cedex 2, France.

<sup>2</sup>Department of Pharmaceutical Sciences, University of Antwerp (Campus Drie Eiken), Universiteitsplein 1, BE-2610 Antwerp, Belgium.

<sup>3</sup>Plate-forme Technologique-Spectrométrie de Masse, Institut de Chimie de Nice (CNRS, FR 3037), University of Nice Sophia-Antipolis, Faculty des Sciences, Parc Valrose, 06108 Nice Cedex 2, France.

<sup>4</sup>Department of Analytical Chemistry, Institute for Nuclear Sciences, Ghent University, Proeftuinstraat 86, BE-9000 Gent, Belgium.

\*Corresponding authors:

<sup>1</sup>Institut de Chimie de Nice (CNRS, FR 3037), University of Nice Sophia-Antipolis, Faculty of Sciences, Parc Valrose, 06108 Nice Cedex 2, France.

E-mail address: nathalie.sauret@unice.fr (N. Sauret)

<sup>2</sup>Department of Pharmaceutical Sciences, University of Antwerp (Campus Drie Eiken), Universiteitsplein 1, BE-2610 Antwerp, Belgium.

E-mail address: magda.claeys@ua.ac.be (M. Claeys)

**Table S1:** List of control experiments; all experiments were conducted in three different solvents (i.e., methanol, acetonitrile, and acetone).

| Experiment                                                                              | pH $\pm$ 0.15 |
|-----------------------------------------------------------------------------------------|---------------|
| MGly Standard ( $10^{-3}$ M)                                                            | 5.3           |
| MGly + H <sub>2</sub> SO <sub>4</sub>                                                   | (3-5)         |
| MGly + (NH <sub>4</sub> ) <sub>2</sub> SO <sub>4</sub>                                  | 5             |
| MGly + Na <sub>2</sub> SO <sub>4</sub>                                                  | 5.2           |
| MGly + NaCl                                                                             | 5.2           |
| MGly + (NH <sub>4</sub> ) <sub>2</sub> SO <sub>4</sub> + H <sub>2</sub> SO <sub>4</sub> | (3-5)         |
| MGly + Na <sub>2</sub> SO <sub>4</sub> + H <sub>2</sub> SO <sub>4</sub>                 | (3-5)         |
| MGly + NaCl + H <sub>2</sub> SO <sub>4</sub>                                            | (3-5)         |

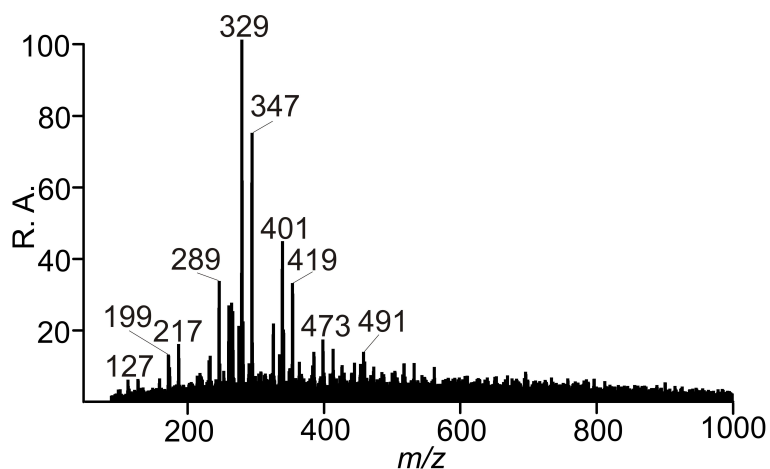

**Figure S1.** ESI mass spectrum of aldol products (positive mode) obtained from the reaction mixture of MGly ( $10^{-3}$  mol L $^{-1}$ ) with ammonium sulfate ( $10^{-4}$  mol L $^{-1}$ ) at pH = 4.5 and T = 15°C after zero hour reaction (solvent: acetonitrile). The abundant ions at  $m/z$  329 and 401 correspond to the sodiated mono-hydrated forms of 4- and 5-mers, while the ions at  $m/z$  347, 419 and 491 correspond to the sodiated di-hydrated forms of 4-, 5- and 6-mers.

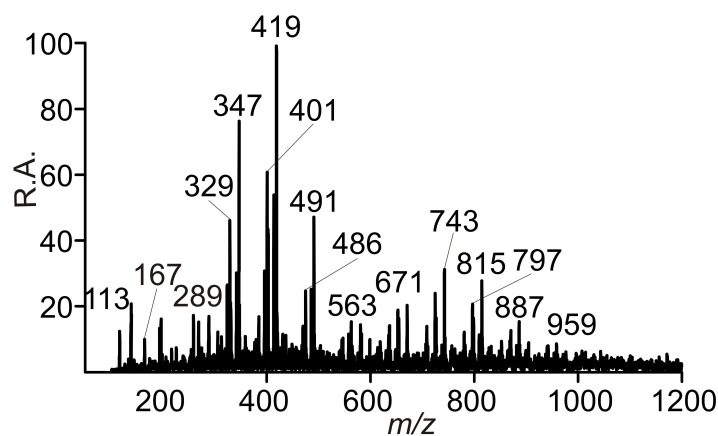

**Figure S2.** ESI mass spectrum of aldol products (positive mode) obtained from the reaction mixture of MGly ( $10^{-3}$  mol L $^{-1}$ ) with ammonium sulfate ( $10^{-4}$  mol L $^{-1}$ ) at pH = 4.5 and T = 15 °C after one hour reaction (solvent: acetonitrile). The ions at  $m/z$  743 and 815 correspond to the sodiated forms of 10- and 11-mers, showing that the  $m/z$  pattern compared to that at the onset of the reactions (Fig. S1) changes in time.

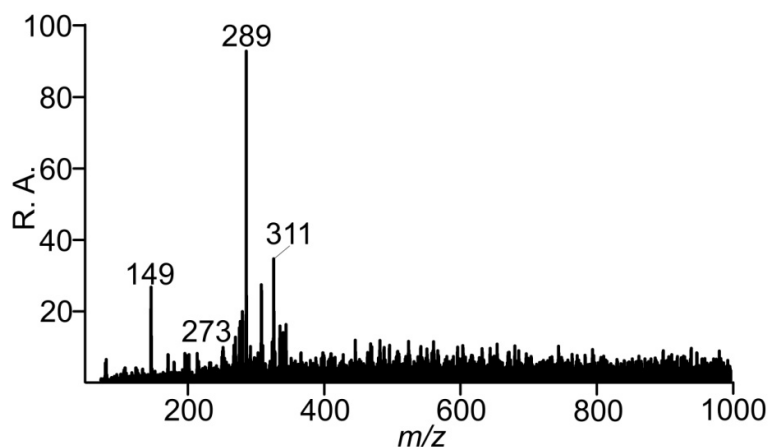

**Figure S3.** ESI mass spectrum of standard MGly ( $10^{-3}$  mol L $^{-1}$ ) (positive mode) at pH = 5.3 and T = 15 °C (solvent: methanol). The ion at  $m/z$  311 corresponds to the sodiated tetramer (Table 1), indicating that methylglyoxal has the potential of self-oligomerization to a certain extent (the abundant ion at  $m/z$  289 could not be assigned and is likely not related to methylglyoxal).

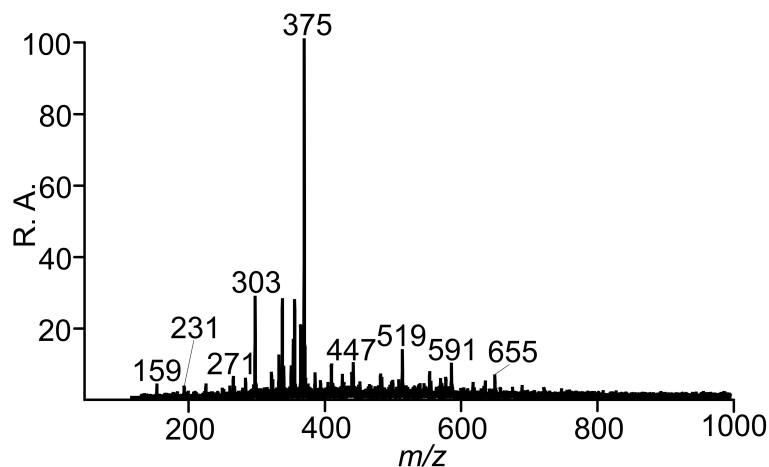

**Figure S4.** ESI mass spectrum of MGly ( $10^{-3}$  mol L $^{-1}$ ) (positive mode) at pH = 4.5 and T = 15 °C (solvent: methanol). The abundant ion peaks at  $m/z$  303 and 375 correspond to sodiated tri- and tetramers (Table 1), clearly indicating the enhancement in the self-oligomerization of methylglyoxal upon a slight increase in the acidity of the medium.

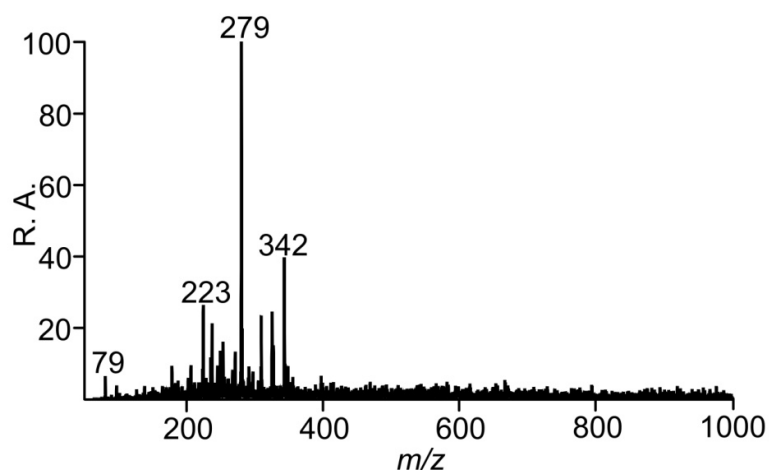

**Figure S5.** ESI mass spectrum of MGly ( $10^{-3}$  mol L $^{-1}$ ) (positive mode) at pH = 3.3 and T = 15 °C (solvent: methanol). The abundant ion at  $m/z$  342 corresponds to the tetramer formed via acetal formation, supporting that this mechanism has a strict pH limitation; the main peak at  $m/z$  279 does not relate to methylglyoxal reactions but could be due to plasticizer contamination with dibutylphthalate.

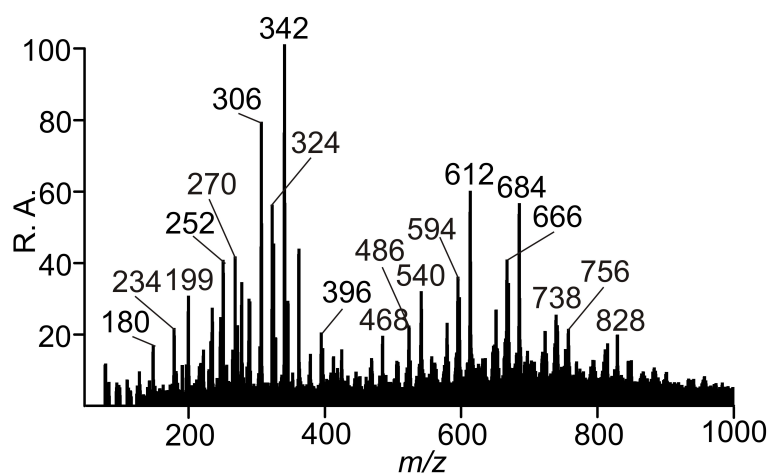

**Figure S6.** ESI mass spectrum of acetal products (positive mode) obtained from the reaction mixture of MGly ( $10^{-3}$  mol L $^{-1}$ ) with sodium sulfate ( $10^{-4}$  mol L $^{-1}$ ) at pH = 3.2 and T = 15°C after one hour reaction (solvent: methanol). It can be seen that ions at the same even  $m/z$  values can be detected as in the case of ammonium sulfate (Fig. 2).

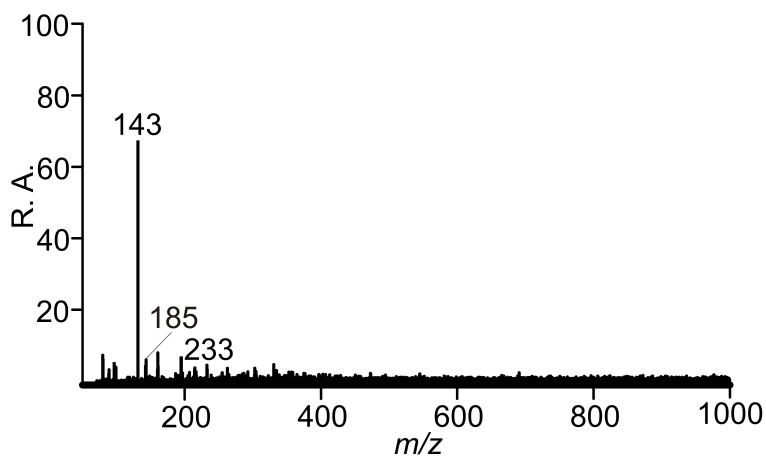

**Figure S7.** ESI mass spectrum of MGly ( $10^{-3}$  mol L $^{-1}$ ) (negative mode) at pH = 5.3 and T = 15 °C (solvent: methanol). The abundant ion at  $m/z$  143 corresponds to the protonated methylglyoxal dimer.

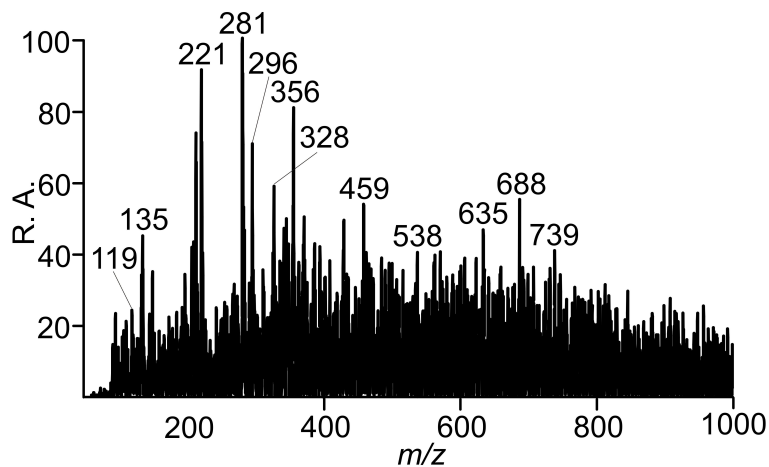

**Figure S8.** ESI mass spectrum (positive mode) obtained from the reaction mixture of MGly ( $10^{-3}$  mol L $^{-1}$ ) with ammonium sulfate ( $10^{-4}$  mol L $^{-1}$ ) at pH = 5 and T = 15 °C after one hour reaction (solvent: methanol). A very noisy and complex spectrum was obtained, with peaks just appearing above background, indicating that these conditions are not favorable for oligomer formation.

**Table S2:** Possible ion structures attributed to selected reaction products of methylglyoxal under simulated cloud conditions on the basis of interpretation of ESI mass spectra.

| $m/z$<br>molecular ion or<br>sodiated molecule | molecular<br>formula | possible structures |
|------------------------------------------------|----------------------|---------------------|
| 167                                            | $C_6H_8O_4$          |                     |
| 180                                            | $C_6H_{12}O_6$       |                     |
| 239                                            | $C_9H_{12}O_6$       |                     |
| 252                                            | $C_9H_{16}O_8$       |                     |
| 311                                            | $C_{12}H_{16}O_8$    |                     |
| 324                                            | $C_{12}H_{20}O_{10}$ |                     |
